# Supplementary material for: FlashPCR: Revolutionising qPCR by Accelerating Amplification through Low ∆T Protocols
Source: Int J Mol Sci. 2024 Feb 28;25(5):2773. doi: 10.3390/ijms25052773 (PMC10932470; doi:10.3390/ijms25052773)
Supplement: Supplementary file 1 [file ijms-25-02773-s001.zip › FINAL supplementary data.xlsx]

## Sheet: Fig 1
T(°C)	cDNA B47 and B50
85	22.4385	23.3408	24.185	23.6844	25.0657	25.493	24.702	25.97	26.14	26.3307	28.9884	28.6093	27.9621	27.4359	27.3518	26.9721	24.7012	24.6343	24.6374	24.4515	23.49	23.9	23.56	23.97	24.32	24.5	24.7	28.9884	28.6093	27.9621	27.4359	26.9721	24.6374	31.6728	26.5994	27.4734
84.7	22.2688	23.4402	24.051	23.3462	25.1923	25.4146	24.7784	25.8	25.71	25.6452	28.9203	28.6324	28.0833	27.9022	27.4663	26.6301	24.7171	24.5874	24.3312	24.6875	23.2	23.42	23.21	24.2	24.19	24.45	25.06	28.9203	28.6324	28.0833	27.9022	26.6301	24.3312	31.6277	27.4757	27.076
84	22.3927	23.0506	23.6838	23.3744	25.1304	25.3656	24.8318	25.91	25.75	25.8274	29.1295	28.8096	27.7749	27.8803	27.1611	26.6418	24.5226	24.6427	24.0151	24.4898	23.15	23.72	23.52	23.89	24.2	24.33	24.69	29.1295	28.8096	27.7749	27.8803	26.6418	24.0151	31.2707	27.0813	28.558
82.9	22.5975	23.1888	23.6727	23.4788	25.2212	25.4579	24.5253	25.87	25.88	26.1586	29.1371	28.6796	27.7898	28.0488	26.5849	26.6051	24.5119	24.561	24.2364	23.9927	23.07	23.46	23.7	23.99	24.27	23.91	25.09	29.1371	28.6796	27.7898	28.0488	26.6051	24.2364	31.2194	27.0522	27.4059
81.4	23.0068	23.1798	23.9866	23.3791	25.3409	25.4469	24.6012	25.89	25.82	26.1812	28.7111	28.4911	27.3072	27.6012	26.7048	26.39	24.5664	24.4728	24.3037	23.9464	23.26	23.37	23.53	23.85	24.49	23.8	24.9	28.7111	28.4911	27.3072	27.6012	26.39	24.3037	32.1913	27.2314	28.1271
80.3	23.1742	23.1338	23.822	23.5253	25.4101	25.4653	24.6943	25.8	25.92	26.1684	29.0687	28.5093	27.8852	27.7747	26.8018	26.4394	24.5149	24.4462	24.023	24.196	23.2	23.65	23.52	24.01	24.32	24.16	24.86	29.0687	28.5093	27.8852	27.7747	26.4394	24.023	31.3392	27.1356	28.1238
79.4	23.2002	22.9109	24.027	23.6866	25.5518	25.4002	24.4255	25.58	26.05	26.1347	28.4527	28.567	27.7063	27.784	27.3069	26.2906	24.4999	24.7141	24.0573	24.067	23.38	23.66	23.64	24.01	24.32	24.1	25.01	28.4527	28.567	27.7063	27.784	26.2906	24.0573	31.9928	27.3919	28.2451
79	23.1936	23.1994	23.6551	23.7334	25.0205	25.1135	25.4888	26	26.22	26.4566	28.7738	29.2931	27.5957	27.9519	26.6944	26.4413	24.6718	24.7103	24.0135	24.2265	23.04	23.61	23.87	24.14	24.35	24.9	25.04	28.7738	29.2931	27.5957	27.9519	26.4413	24.0135	31.934	27.4275	27.7015
∆Cqs
84.7	-0.169655	0.0994148	-0.13402	-0.338235	0.12653	-0.0784258	0.0763866	-0.17	-0.43	-0.685525	-0.0681133	0.0230443	0.121155	0.466261	0.114516	-0.342019	0.015954	-0.0468943	-0.306218	0.235952	-0.29	-0.48	-0.35	0.23	-0.13	-0.05	0.36	-0.0681133	0.0230443	0.121155	0.466261	-0.342019	-0.306218	-0.0451031	0.876339	-0.397411
84	-0.0458232	-0.290203	-0.501171	-0.310004	0.0646197	-0.127413	0.12976	-0.06	-0.39	-0.503265	0.141116	0.200258	-0.187229	0.444381	-0.190665	-0.330302	-0.178522	0.00846341	-0.622308	0.0382234	-0.34	-0.18	-0.04	-0.08	-0.12	-0.17	-0.01	0.141116	0.200258	-0.187229	0.444381	-0.330302	-0.622308	-0.402074	0.481873	1.08457
82.9	0.159019	-0.152017	-0.5123	-0.205593	0.15545	-0.0351315	-0.176708	-0.1	-0.26	-0.172085	0.148671	0.0703007	-0.172326	0.612845	-0.766823	-0.367021	-0.18921	-0.0733116	-0.401048	-0.458793	-0.42	-0.44	0.14	0.02	-0.05	-0.59	0.39	0.148671	0.0703007	-0.172326	0.612845	-0.367021	-0.401048	-0.45344	0.452789	-0.0675337
81.4	0.568306	-0.160982	-0.198429	-0.305369	0.275116	-0.0461645	-0.100777	-0.08	-0.32	-0.149541	-0.277275	-0.118179	-0.654983	0.165257	-0.646929	-0.582098	-0.1348	-0.161452	-0.333742	-0.505098	-0.23	-0.53	-0.03	-0.12	0.17	-0.7	0.2	-0.277275	-0.118179	-0.654983	0.165257	-0.582098	-0.333742	0.518452	0.632055	0.653682
80.3	0.73572	-0.207045	-0.363057	-0.159169	0.344326	-0.0276805	-0.00766197	-0.17	-0.22	-0.162271	0.0802931	-0.100036	-0.0769583	0.338742	-0.54993	-0.532718	-0.186271	-0.188101	-0.614395	-0.255497	-0.29	-0.25	-0.04	0.04	0	-0.34	0.16	0.0802931	-0.100036	-0.0769583	0.338742	-0.532718	-0.614395	-0.333606	0.536184	0.650354
79.4	0.761715	-0.429882	-0.158033	0.00213813	0.486086	-0.09285	-0.276524	-0.39	-0.09	-0.195958	-0.535703	-0.0422948	-0.255808	0.348062	-0.0449127	-0.681423	-0.20128	0.0798042	-0.580153	-0.384569	-0.11	-0.24	0.08	0.04	0	-0.4	0.31	-0.535703	-0.0422948	-0.255808	0.348062	-0.681423	-0.580153	0.319935	0.792469	0.771625
79	0.75506	-0.141378	-0.529932	0.0489886	-0.0452056	-0.379558	0.786761	0.03	0.08	0.125878	-0.214591	0.683788	-0.366418	0.515949	-0.657365	-0.530797	-0.0293308	0.076016	-0.623959	-0.225026	-0.45	-0.29	0.31	0.17	0.03	0.4	0.34	-0.214591	0.683788	-0.366418	0.515949	-0.530797	-0.623959	0.261185	0.828159	0.228116
T(°C)	PCR amplicon B47 and B50
85	17.1289	16.9891	17.0901	16.6581	17.2051	17.2289	17.5504	18.2043	17.5894	18.6869	18.7227	17.13	16.99	17.09	17.36	17.67	18.1	17.83	18.2	18.69	19.8619	20.4286	19.1393	19.7502	19.5488	20.1151	19.5563	19.9424	19.6877
84.7	16.4547	16.6293	17.0201	16.7695	16.7489	17.1777	17.5928	18.1514	17.8757	18.4745	18.6192	16.45	16.63	17.09	17.3	17.69	17.88	17.71	18.15	18.47	19.4447	20.118	18.9829	19.506	19.2052	19.7253	19.4411	19.6901	19.3083
84	16.43	16.5692	16.6581	16.8153	17.3197	17.212	17.6559	17.8217	17.8248	18.3275	18.6653	16.43	16.57	17.12	17.24	17.64	17.61	17.6	17.82	18.33	19.4485	20.1556	18.8839	19.4302	19.1768	19.7283	19.2824	19.5111	19.2044
82.9	16.4312	16.5914	16.7695	16.84	16.5904	17.2099	17.5201	17.9633	17.8638	18.0676	18.728	16.43	16.59	17.18	17.31	17.48	17.79	17.56	17.96	18.07	19.4135	20.1003	18.9978	19.299	19.076	19.7019	19.3592	19.2691	19.4369
81.4	16.5139	16.5179	16.9133	16.9133	16.6347	17.2887	17.4576	17.6842	17.9429	18.1531	18.5706	16.51	16.52	17.19	17.31	17.44	17.58	17.92	17.68	18.15	19.2677	19.8973	18.8946	19.4443	19.1591	19.6562	19.3444	19.2919	19.1893
80.3	16.6109	16.6306	16.8153	16.933	16.4176	17.2871	17.4899	17.6617	18.0789	18.4822	18.7234	16.61	16.63	17.2	17.2	17.65	17.75	17.58	17.66	18.48	19.7985	20.1115	18.886	19.3885	19.1726	19.7767	19.3416	19.1736	19.1422
79.4	16.7329	16.7858	16.84	17.0201	16.7356	17.1539	17.2895	18.1048	18.0581	18.1454	18.7761	16.73	16.79	17.26	17.36	17.59	17.92	17.72	18.1	18.15	19.1956	20.0737	18.812	19.4939	19.1142	19.6938	19.2991	19.4814	19.1329
79	16.6826	16.8344	16.933	17.0901	17.1241	17.4322	17.8021	18.1095	18.1685	18.3882	18.8383	16.68	16.83	17.39	17.41	17.78	17.82	18.05	18.11	18.39	19.6898	20.0008	19.0558	19.6101	19.3101	20.0027	19.5325	19.2835	19.0549
∆Cqs
84.7	-0.674227	-0.359807	-0.0700404	0.111404	-0.456249	-0.0512337	0.0424305	-0.0528166	0.286302	-0.212409	-0.103579	-0.68	-0.36	0	-0.06	0.02	-0.22	-0.12	-0.05	-0.22	-0.417206	-0.310565	-0.156418	-0.244163	-0.343638	-0.389818	-0.115223	-0.252304	-0.379454
84	-0.698846	-0.419896	-0.431959	0.157182	0.114555	-0.0168728	0.105494	-0.382517	0.23538	-0.3594	-0.0574599	-0.7	-0.42	0.03	-0.12	-0.03	-0.49	-0.23	-0.38	-0.36	-0.413404	-0.273016	-0.255404	-0.319954	-0.37203	-0.386862	-0.273943	-0.431351	-0.483346
82.9	-0.69767	-0.39768	-0.320555	0.181886	-0.614777	-0.0190482	-0.0302914	-0.240969	0.27448	-0.619271	0.00522942	-0.7	-0.4	0.09	-0.05	-0.19	-0.31	-0.27	-0.24	-0.62	-0.44846	-0.32833	-0.141566	-0.451177	-0.472799	-0.413252	-0.197102	-0.673266	-0.250858
81.4	-0.614942	-0.471115	-0.17675	0.255209	-0.570398	0.0597654	-0.0927978	-0.520023	0.353551	-0.533727	-0.152116	-0.62	-0.47	0.1	-0.05	-0.23	-0.52	0.09	-0.52	-0.54	-0.594207	-0.531331	-0.2447	-0.305926	-0.389762	-0.45896	-0.211969	-0.650493	-0.498422
80.3	-0.517971	-0.358465	-0.274777	0.274914	-0.78755	0.0581337	-0.0604574	-0.542558	0.489562	-0.204668	0.000640007	-0.52	-0.36	0.11	-0.16	-0.02	-0.35	-0.25	-0.54	-0.21	-0.0634191	-0.317074	-0.253306	-0.361737	-0.376262	-0.338474	-0.214752	-0.768843	-0.545526
79.4	-0.396018	-0.203299	-0.250073	0.361919	-0.469583	-0.0750388	-0.26087	-0.0994415	0.468758	-0.541449	0.0533462	-0.4	-0.2	0.17	0	-0.08	-0.18	-0.11	-0.1	-0.54	-0.666312	-0.35485	-0.327357	-0.256303	-0.434629	-0.421335	-0.257265	-0.461011	-0.554833
79	-0.446256	-0.154691	-0.157045	0.431959	-0.0809944	0.203287	0.251736	-0.0947343	0.579096	-0.298678	0.115563	-0.45	-0.16	0.3	0.05	0.11	-0.28	0.22	-0.09	-0.3	-0.1721	-0.427817	-0.0835607	-0.14011	-0.238779	-0.112459	-0.0237855	-0.658911	-0.632864
T(°C)	cDNA B47 and B50
72	23.26	23.76	24.8258	24.7258	25.7645	26.1451	26.0135	27.61	23.43	23.77	24.07	24.26	26.54	24.71	24.77	29.5597	29.5017	28.6745	28.7639	27.9789	27.5821	24.5956	24.7881	24.6895	24.4858	29.5597	29.5017	28.6745	28.7639	27.5821	24.6895	33.41	31.7315	30.6409	27.697	28.8689
71.7	23.09	23.24	23.5634	24.1879	25.0322	25.8029	25.5709	26.82	23.15	23.48	23.73	23.79	24.55	24.27	24.53	28.9871	28.6164	28.2073	27.7937	27.8673	27.093	24.7025	24.455	24.3476	24.2766	28.9871	28.6164	28.2073	27.7937	27.093	24.3476	34.97	31.1298	30.2281	27.4883	28.638
71.2	23.18	23.56	23.2482	24.0622	25.1782	25.7885	25.3103	26.24	23.12	22.68	23.85	23.65	24.05	24.26	23.6	28.57	28.4586	27.7432	27.2655	27.57	26.9584	24.4951	24.3848	24.1822	24.1895	28.57	28.4586	27.7432	27.2655	26.9584	24.1822	34.3	30.7461	30.4281	27.1418	28.2376
70.2	23.03	23.47	22.7948	23.8081	25.1637	25.3764	25.0046	25.9	22.7	23.14	22.99	23.34	23.74	24.02	23.66	28.1193	28.1732	27.3675	27.2487	27.3081	26.7094	24.2727	24.2037	24.092	24.0091	28.1193	28.1732	27.3675	27.2487	26.7094	24.092	32.45	31.1804	30.2187	27.1129	28.136
69	23.1	23.38	22.9773	23.4144	25.0206	25.2074	25.1952	25.7	22.55	23.21	22.96	23.46	23.24	23.82	24.01	28.0092	28.1503	27.0342	26.9594	27.3009	26.6418	24.3667	24.2253	24.0081	23.9094	28.0092	28.1503	27.0342	26.9594	26.6418	24.0081	34.16	30.8868	29.6329	26.9435	27.9237
68	22.72	23.45	23.0223	23.6348	24.9354	25.2838	25.1212	25.88	22.02	23.03	22.94	22.81	23.27	23.86	23.61	27.8993	27.8511	27.0708	27.2166	27.1246	26.6904	24.3927	24.2179	23.826	23.847	27.8993	27.8511	27.0708	27.2166	26.6904	23.826	33.21	30.7554	30.0895	27.1016	28.1731
67.4	22.57	23.2	22.7801	23.6564	25.0763	25.1944	24.8619	26.08	22.37	22.8	23.09	23.44	23.24	23.94	23.96	28.1325	28.3878	27.2718	27.1955	27.2752	26.5486	24.2844	24.1002	23.8317	23.916	28.1325	28.3878	27.2718	27.1955	26.5486	23.8317	Error	30.2576	Error	27.0146	28.5119
67	22.73	23.14	23.2438	23.7851	24.9507	25.3606	25.4591	26.09	22.31	22.75	23.04	23.31	23.45	23.6	23.74	28.0544	28.0313	27.1757	27.1025	27.2442	26.946	24.3417	24.3362	23.8854	24.0037	28.0544	28.0313	27.1757	27.1025	26.946	23.8854	32.91	30.6592	30.1718	27.2095	28.2599
∆Cqs
72	0.53	0.62	1.58199	0.94069	0.813757	0.784522	0.554379	1.52	1.12	1.02	1.03	0.95	3.09	1.11	1.03	1.50526	1.47042	1.49877	1.66139	0.734721	0.636081	0.253967	0.451888	0.80412	0.482067	1.50526	1.47042	1.49877	1.66139	0.636081	0.80412	0.5	1.07237	0.469066	0.487417	0.608973
71.7	0.36	0.1	0.319668	0.402805	0.0814971	0.442325	0.111753	0.73	0.84	0.73	0.69	0.48	1.1	0.67	0.79	0.932685	0.585104	1.03154	0.691164	0.623104	0.146971	0.36085	0.118812	0.462226	0.272859	0.932685	0.585104	1.03154	0.691164	0.146971	0.462226	2.06	0.470671	0.0563121	0.278767	0.378034
71.2	0.45	0.42	0.00438988	0.277161	0.227479	0.427986	-0.148802	0.15	0.81	-0.07	0.81	0.34	0.6	0.66	-0.14	0.515594	0.427321	0.567465	0.163032	0.325846	0.0123849	0.15346	0.0485632	0.296822	0.185778	0.515594	0.427321	0.567465	0.163032	0.0123849	0.296822	1.39	0.0869818	0.256298	-0.0676903	-0.0223049
70.2	0.3	0.33	-0.449	0.0230783	0.212961	0.0158276	-0.454565	-0.19	0.39	0.39	-0.05	0.03	0.29	0.42	-0.08	0.0649089	0.141881	0.191794	0.146187	0.0638578	-0.236559	-0.0689223	-0.13257	0.206553	0.00539572	0.0649089	0.141881	0.191794	0.146187	-0.236559	0.206553	-0.46	0.521211	0.0468661	-0.0966265	-0.123961
69	0.37	0.24	-0.266424	-0.37068	0.0699003	-0.153105	-0.263915	-0.39	0.24	0.46	-0.08	0.15	-0.21	0.22	0.27	-0.0451982	0.119015	-0.141491	-0.143134	0.0567341	-0.304175	0.0250184	-0.110965	0.122751	-0.0942814	-0.0451982	0.119015	-0.141491	-0.143134	-0.304175	0.122751	1.25	0.227698	-0.538904	-0.266078	-0.336206
68	-0.01	0.31	-0.221483	-0.150266	-0.0153224	-0.0767262	-0.337953	-0.21	-0.29	0.28	-0.1	-0.5	-0.18	0.26	-0.13	-0.155085	-0.180143	-0.104903	0.114094	-0.119569	-0.255604	0.051032	-0.118319	-0.05941	-0.156749	-0.155085	-0.180143	-0.104903	0.114094	-0.255604	-0.05941	0.3	0.0962018	-0.082308	-0.107928	-0.0868565
67.4	-0.16	0.06	-0.46364	-0.128717	0.125576	-0.166147	-0.597213	-0.01	0.06	0.05	0.05	0.13	-0.21	0.34	0.22	0.0781102	0.356516	0.0960472	0.0930166	0.0309848	-0.397361	-0.0572187	-0.236055	-0.0536749	-0.0877377	0.0781102	0.356516	0.0960472	0.0930166	-0.397361	-0.0536749		-0.401575		-0.194914	0.251955
T(°C)	PCR amplicon B47 and B50
72	18.1135	18.0229	17.4183	18.1228	18.6975	18.9722	17.28	17.45	18.09	18.04	18.62	18.38	18.39	19.48	20.04	19.7447	20.6105	19.9311	20.1468	19.6601	20.1015	20.0349	19.5555	19.5768	19.8855	19.6461
71.7	17.9912	17.6611	17.3111	17.9009	18.3091	18.9175	16.66	17.03	17.91	17.8	18.13	18.03	18.26	19.17	19.22	19.6671	20.3588	19.7479	20.1763	19.4268	19.7903	19.598	19.482	19.6259	19.3043	18.9975
71.2	17.363	17.5279	17.205	17.5711	18.06	18.3619	16.49	17.04	17.59	17.59	17.6	17.79	17.97	18.85	19.08	19.5099	19.896	19.6775	20.0402	19.3306	19.7784	19.5396	19.1101	19.0989	19.0664	19.1012
70.2	17.2806	17.2683	17.1561	17.6223	17.9019	18.2112	16.6	16.69	17.34	17.54	17.23	17.7	17.82	18.61	18.89	19.3406	19.724	19.4191	19.8197	19.1466	19.3455	19.2893	18.9137	18.853	19.0117	18.8823
69	17.0902	17.2132	17.0557	17.4481	17.8213	18.4092	16.61	16.64	17.15	17.32	17.21	17.73	17.8	18.56	18.98	19.2724	19.5608	19.1432	19.6679	19.168	19.2103	19.2549	18.6412	18.6957	18.8102	18.8949
68	17.0814	17.2458	17.12	17.414	17.7575	18.0417	16.24	16.73	17.26	17.33	17.2	17.55	17.74	18.75	19.04	19.391	19.6655	19.2542	19.5201	19.2627	19.1921	19.2596	18.74	18.8935	18.7694	18.6805
67.4	17.0876	17.2553	17.1408	17.7135	17.7057	18.0488	16.37	16.86	17.08	17.34	17.21	17.48	17.6	18.7	19.28	19.336	19.5555	19.394	19.474	19.3058	19.2343	19.1703	18.8664	18.6364	18.8612	18.797
67	17.0773	17.1018	17.1626	17.4831	17.7876	18.1177	16.84	17.07	17.29	17.39	17.39	17.58	17.91	18.79	19.33	19.2889	19.7559	19.2435	19.6301	20.4007	19.4223	19.3493	19.0444	19.1049	18.9207	18.953
∆Cqs
72	1.03617	0.921085	0.255685	0.639676	0.909879	0.854504	0.44	0.38	0.8	0.65	1.23	0.8	0.48	0.69	0.71	0.455813	0.854609	0.687521	0.51669	-0.740562	0.67913	0.685645	0.511112	0.471955	0.96477	0.693158
71.7	0.913899	0.559325	0.148513	0.417764	0.521493	0.799825	-0.18	-0.04	0.62	0.41	0.74	0.45	0.35	0.38	-0.11	0.378248	0.602988	0.504361	0.546241	-0.973889	0.36796	0.248704	0.437672	0.521051	0.383628	0.0444904
71.2	0.285645	0.426039	0.0424164	0.0879585	0.272354	0.244221	-0.35	-0.03	0.3	0.2	0.21	0.21	0.06	0.06	-0.25	0.22108	0.14011	0.433934	0.410127	-1.07005	0.356093	0.19028	0.0657326	-0.00594708	0.145713	0.148184
70.2	0.203267	0.166496	-0.00650447	0.13919	0.114251	0.0935156	-0.24	-0.38	0.05	0.15	-0.16	0.12	-0.09	-0.18	-0.44	0.0517477	-0.0318768	0.175511	0.189545	-1.25405	-0.0768797	-0.0600108	-0.130672	-0.251835	0.0910273	-0.0706508
69	0.0128452	0.111421	-0.106928	-0.0350664	0.0337111	0.291534	-0.23	-0.43	-0.14	-0.07	-0.18	0.15	-0.11	-0.23	-0.35	-0.0164602	-0.195029	-0.100348	0.0377578	-1.23267	-0.211989	-0.0944237	-0.403119	-0.409175	-0.110532	-0.0580955
68	0.00412021	0.143973	-0.042597	-0.0691304	-0.0301613	-0.0759308	-0.6	-0.34	-0.03	-0.06	-0.19	-0.03	-0.17	-0.04	-0.29	0.10214	-0.0903769	0.0106268	-0.109988	-1.13793	-0.230264	-0.0896791	-0.304364	-0.211394	-0.151265	-0.272464
67.4	0.0102965	0.153503	-0.0218129	0.230386	-0.0819218	-0.0688399	-0.47	-0.21	-0.21	-0.05	-0.18	-0.1	-0.31	-0.09	-0.05	0.0471557	-0.2003	0.150493	-0.156109	-1.09492	-0.188029	-0.178933	-0.177983	-0.468479	-0.0594534	-0.155973

## Sheet: Cqs Fig 1 3 4 5 6 
Figure 1A							Figure 1B
T(°C)	B47	Com 1	Com 2				T(°C)	B47	Com 1	Com 2
85	26.5994	30.4088	28.8962				72	30.8365	31.8994	33.2678
84.7	27.4757	30.6485	30.0205				71.7	30.3749	30.338	31.8983
84	27.0813	30.817	29.2509				71.2	30.5862	31.1853	30.7573
82.9	27.0522	32.8521	30.1488				70.2	30.3559	30.3251	29.5794
81.4	27.2314	30.6569	30.4323				69	29.8006	31.0977	29.8284
80.3	27.1356	30.8787	28.3416				68	30.2107	31.1196	29.0117
79.4	27.3919	30.6316	28.4343				67.4	29.0013	31.0988	29.1857
79	27.4275	32.5807	31.7691				67	30.301	30.0884	29.863
Figure 3A							Figure 3B
T(°C)	Buffer 25						T(°C)	Buffer 25
90	28.17						72	27.1
89.5	27.57						71.7	27.47
88.4	27.83						71.2	27.48
86.4	27.91						70.2	27.15
84	27.94						69	27.2
82.1	27.87						68	27.12
80.7	28.06						67.4	27.13
80	28.19						67	27.32
Figure 4A							Figure 4B
CoV-E	Clara	Luna	US/B47				TSG-6	B25	B27	B47	B50
Cq1	27.0438	27.1065	25.9164				Cq1	22.619	26.321	22.2036	22.325
Cq2	26.5403	27.1677	26.4261				Cq2	22.4736	26.6082	22.4536	22.5873
Cq3	25.7768	26.4447	26.0912				Cq3	22.4563	26.539	21.8868	22.9163
Cq4	25.6455	25.8013	25.9478				Cq4	22.3351	26.3114	23.064	23.2612
Nsp10	Clara	Luna	US/B47				HGF-1	B25	B27	B47	B50
Cq1	26.541	25.1898	26.0885				Cq1	21.8869	25.7934	20.6509	20.2104
Cq2	26.6587	25.5113	26.4008				Cq2	21.6742	25.9748	21.0336	20.3221
Cq3	26.1458	25.4242	26.7375				Cq3	21.7766	25.5216	20.3558	20.5795
Cq4	24.7552	24.8001	26.2442				Cq4	21.6995	25.3231	20.9346	21.0547
Figure 5A							Figure 5B							Figure 5C							Figure 5D
	CFX +RT							CFX -RT							Opus +RT							Opus -RT
B47/ES	TSG-6	HGF-1	GAPDH	CDKN1A	NTC		B47/ES	TSG-6	HGF-1	GAPDH	CDKN1A	NTC		B47/ES	TSG-6	HGF-1	GAPDH	CDKN1A	NTC		B47/ES	TSG-6	HGF-1	GAPDH	CDKN1A	NTC
Cq1	20.7926	23.531	18.7629	18.6262	ND		Cq1	21.3606	24.2374	19.1401	19.1727	ND		Cq1	21.0637	21.0439	19.5281	18.4286	ND		Cq1	21.3488	22.047	19.1677	18.6237	ND
Cq2	20.9472	22.764	18.7038	18.4027	ND		Cq2	21.0857	23.7049	18.7666	19.0919	ND		Cq2	20.7789	20.712	19.4654	18.5349	ND		Cq2	21.1424	21.7885	19.0975	18.7337	ND
Cq3	20.553	22.3555	18.6919	18.1736			Cq3	20.8507	23.8949	18.518	18.7224			Cq3	20.916	20.9211	19.2218	18.3015			Cq3	21.06	22.0473	18.6212	18.4903
Cq4	20.6321	22.4464	18.3804	17.8378			Cq4	20.9898	23.8352	18.1888	18.8741			Cq4	20.6519	20.6103	19.3781	18.3112			Cq4	21.0311	21.6622	18.6918	18.5892
Cq5	20.7753	22.5386	18.3722	18.2369			Cq5	20.7625	23.8547	18.3519	19.1767			Cq5	20.8307	20.8021	19.3094	18.2421			Cq5	20.7088	21.362	18.7979	18.4667
Cq6	20.4599	22.2659	18.053	18.2067			Cq6	21.1519	23.6691	18.0783	18.6865			Cq6	20.5273	20.4849	19.6629	18.3303			Cq6	21.5857	22.2156	18.8871	18.5679
Cq7	20.9544	22.6919	18.0895	18.1855			Cq7	20.7906	23.3576	18.4949	19.1241			Cq7	20.6108	20.5071	19.4289	18.2805			Cq7	20.6738	21.2207	18.6879	18.2606
Cq8	20.6923	22.5782	18.1997	18.0889			Cq8	21.095	23.4331	18.2199	18.7139			Cq8	20.9637	20.8881	19.4162	18.3388			Cq8	20.811	21.2529	18.5767	18.4207
Cq9	20.8626	22.581	18.1132	18.1647			Cq9	20.8923	23.4108	18.3184	19.1164			Cq9	20.6186	20.5623	19.525	18.219			Cq9	20.8766	21.3054	18.648	18.3807
Cq10	20.5525	22.5316	18.4244	18.1784			Cq10	21.1241	23.1547	18.3603	18.7806
Cq11	20.6311	22.6274	18.1997	18.1687			Cq11	20.7806	23.3738	18.4089	18.9653
Cq12	20.3109	22.2607	18.0885	18.2577			Cq12	21.2407	23.3694	18.3171	18.7718
Cq13	20.5149	22.4458	18.5044	18.2335			Cq13	20.8501	23.2772	18.5771	18.8825
Cq14	20.7854	22.5432	18.2911	18.3152			Cq14	21.1835	23.3007	18.374	18.9999
Cq15	21.047	22.6584	19.0438	18.4198			Cq15	21.166	23.4358	18.8528	19.3836
Cq16	21.0423	22.6054	18.7463	18.1689			Cq16	21.1974	23.3039	18.93	19.0974
Figure 6A							Figure 6B							Figure 6C							Figure 6D
CoV-E	Protocol R4						CoV-E	Protocol R5						CoV-E	Protocol R6						CoV-E	Protocol R7
Replicate	A	B					Replicate	A	B					Replicate	A	B					Replicate	A	B
Cq1	24.85	24.68					Cq1	24.51	24.46					Cq1	24.99	24.37					Cq1	26.2	25.66
Cq2	24.11	25.2					Cq2	24.12	24.44					Cq2	25.19	24.58					Cq2	26.06	26.1
Cq3	25.16	24.77					Cq3	24.26	24.37					Cq3	24.62	25.03					Cq3	26.8	26.21
Cq4	22.33	24.15					Cq4	24.72	23.62					Cq4	24.6	23.92					Cq4	26.55	25.62

## Sheet: Fig S2
	Standard	ΔT=10	ΔT=9	ΔT=8		Standard	ΔT=10	ΔT=9	ΔT=8		Standard	ΔT=10	ΔT=9	ΔT=8		Standard	ΔT=10	ΔT=9	ΔT=9	ΔT=8		Standard	ΔT=8
Expt 1	90 90 60	80 80 70	80 80 71	79 79 71	Expt 2	90 90 60	80 80 70	80 80 71	79 79 71	Expt 3	90 90 60	80 80 70	80 80 71	79 79 71	Expt 4	90 90 60	80 80 70	80 80 71	79 79 70	79 79 71	Expt 5	90 90 60	79 79 71
Cq1	25.1615	26.0606	24.6485	24.9336	Cq1	26.0824	26.34	26.1388	26.4231	Cq1	25.9166	25.7544	25.5044	26.5164	Cq1	26.0824	26.34	26.1388	27.2156	26.4231	Cq1	25.2648	26.8202
Cq2	25.2215	25.8985	24.6434	25.0075	Cq2	25.8513	27.0677	25.5952	26.4901	Cq2	25.7235	25.9235	26.2677	26.9343	Cq2	25.8513	27.0677	25.5952	26.5669	26.4901	Cq2	25.1913	26.589
Cq3	25.1705	26.1444	24.6229	24.9737	Cq3	26.0893	26.2044	26.0317	26.8885	Cq3	25.7884	26.4851	25.7116	25.5968	Cq3	26.0893	26.2044	26.0317	26.4925	26.8885	Cq3	25.2467	26.2153
Cq4	25.2099	26.2362	25.4738	24.9453	Cq4	26.0934	26.1271	26.08	26.2484	Cq4	25.9305	25.4574	25.3475	26.108	Cq4	26.0934	26.1271	26.08	26.349	26.2484	Cq4	25.1712	26.2021
					Cq5	25.5766	26.0028	25.9808	27.2387	Cq5	26.6558	25.1504	26.2175	27.4361	Cq5	25.9166	25.7544	25.5044	26.9298	26.5164	Cq5	25.1172	26.1862
					Cq6	24.98	25.2285	25.8568	26.9145	Cq6	28.0293	25.4051	25.6488	26.7792	Cq6	25.7235	25.9235	26.2677	27.4495	26.9343	Cq6	25.3263	26.1673
					Cq7	25.6536	25.4072	25.8319	27.2378	Cq7	26.9416	25.1789	25.5432	27.3392	Cq7	25.7884	26.4851	25.7116	26.6195	25.5968	Cq7		26.1126
					Cq8	26.6081	25.7129	26.1654	26.7483	Cq8	26.0825	25.4771	25.6109	27.2026	Cq8	25.9305	25.4574	25.3475	26.6365	26.108	Cq8		26.0927
															Cq9		26.0028	25.9808	25.7588	27.2387	Cq9		26.0542
															Cq10		25.2285	25.8568	25.8372	26.9145	Cq10		26.0398
															Cq11		25.4072	25.8319	25.3863	27.2378	Cq11		26.0273
															Cq12		25.7129	26.1654	25.9229	26.7483	Cq12		26.0246
															Cq13		25.1504	26.2175	26.2145	27.4361	Cq13		25.9486
															Cq14		25.4051	25.6488	25.671	26.7792	Cq14		25.9112
															Cq15		25.1789	25.5432	25.5674	27.3392	Cq15		25.8168
															Cq16		25.4771	25.6109	26.3776	27.2026	Cq16		25.7298
															Cq17						Cq17		25.6897
															Cq18						Cq18		25.63
															Cq19						Cq19		25.438
															Cq20						Cq20		25.2952
AVE?
SD?

## Sheet: Fig S1 S3 S5 S6 S7 S8 S9
Figure S1A							Figure S1B							Figure S1C						Figure S1D
[Probe]	0.05µM	0.1µM	0.2µM	0.3µM	0.4µM		[Primer]	1.5µM	1.0µM	0.75µM	0.5µM	0.25µM		T(°C)	0.06U/rxn		0.12U/rxn			T(°C)	0.06U/rxn		0.12U/rxn
Cq1	26.7	25.96	24.86	24.31	24.27		Cq1	24.32	25.15	24.11	25.09	25.83		85	17.27	17.39	17.51	17.65		72	18.1325	18.4715	18.4006	18.2918
Cq2	26.85	25.84	24.67	24.4	24.54		Cq2	24.53	25.18	24.94	25.23	25.8		84.7	17.08	17.04	17.43	17.39		71.7	18.0716	19.0088	19.0664	18.179
							Cq3	24.2	24.9	25.23	24.63	25.65		84	17.08	17.09	17.68	17.53		71.2	18.674	18.8604	18.0469	18.1749
														82.9	17.15	16.91	17.38	17.54		70.2	18.4143	18.582	17.9453	18.3914
														81.4	17.08	16.91	17.64	17.71		69	18.7538	18.9891	17.6511	18.4501
														80.3	17.4	17.27	17.64	17.7		68	17.3591	18.3709	17.3032	18.0538
														79.4	17.3	17.66	17.77	17.85		67.4	17.7365	18.6085	17.3153	18.6104
														79	17.88	18.15	18.13	18.53		67	17.3863	18.2624	17.1951	18.8738
Figure S3A							Figure S3B
T(°C)	DNA primers	PB primers					T(°C)	DNA primers	PB primers
85	22.3653	22.8682					72	23.9392	24.0335
84.7	22.1146	22.2633					71.7	23.8657	23.9546
84	22.2141	22.2248					71.2	23.7007	23.7284
82.9	22.1301	22.304					70.2	23.3506	23.6433
81.4	22.0207	22.6725					69	23.2668	23.4245
80.3	22.2668	22.5433					68	23.1575	23.3611
79.4	22.2396	22.6324					67.4	23.1177	23.3777
79	22.3903	22.9599					67	23.2425	23.5063
Figure S5A			Figure S5B			Figure S5C			Figure S5D			Figure S5E			Figure S5F
C. auris			C. auris			A. fumigatus			A. fumigatus			A. castelanii			A. castelanii
T (°C)	B27		T (°C)	B27		T (°C)	B27		T (°C)	B27		71°C pol	B27			B27
90	18.6057		71	18.6523		90	30.2803		71	29.7929		90	23.6981		71	23.7351
89.5	18.317		70.8	18.4444		89.5	29.6755		70.8	29.9114		89.5	23.3039		70.8	23.3365
88.4	18.2947		70.4	18.3833		88.4	30.0565		70.4	29.7419		88.4	23.4476		70.4	22.9647
86.4	18.4226		69.6	18.312		86.4	29.9243		69.6	29.5206		86.4	23.5162		69.6	22.7757
84	18.4538		68.6	18.2892		84	29.6081		68.6	29.5112		84	23.6662		68.6	22.7593
82.1	18.5018		67.8	18.3772		82.1	30.1652		67.8	29.4613		82.1	23.4209		67.8	22.6896
80.7	18.5427		67.3	18.5003		80.7	30.0566		67.3	29.5872		80.7	23.0626		67.3	22.8426
80	18.5372		67	18.4179		80	30.165		67	29.3939		80	23.2339		67	23.0035
Figure S6A								Figure S6B									Figure S6B
	GAPDH								TSG-6									HGF-1
RT/buffer	ES/ES	ES/B47	SSIV/SSIV	SSIV/B47	US-2/US-2	US-2/B47		RT/buffer	ES/ES	ES/B47	SSIV/SSIV	SSIV/B47	US-2/US-2	US-2/B47	NTC SS4		RT/buffer	ES/ES	ES/B47	SSIV/SSIV	SSIV/B47	US-2/US-2	US-2/B47	NTC SS4
Cq1	20.3543	19.9684	19.4254	19.4194	21.0623	19.3227		Cq1	27.7372	27.9277	26.2412	26.6609	27.6472	26.6731	ND		Cq1	27.04	27.33	25.71	26.13	27.19	26.19	ND
Cq2	19.2482	19.2057	18.2096	19.0417	19.7684	19.6107		Cq2	26.3718	27.8166	25.4218	25.9664	27.03	26.9734	ND		Cq2	26.69	27.28	25.04	25.59	26.55	26.34	ND
Figure S7A																	Figure S7B
	ES/ES buffer							ES/B47										US- 2/US-2 buffer				US-2/B47
Replicate	RT1	RT2	RT3	RT4	RT5	RT6	RT7	RT1	RT2	RT3	RT4	RT5	RT6	RT7			Replicate	RT1	RT2	RT3	RT4	RT1	RT2	RT3	RT4
Cq1	27.5028	27.3308	27.3155	28.0665	26.9	27.7842	27.1015	26.832	27.1569	27.5543	27.862	27.5181	27.613	27.271			Cq1	33.1325	32.3985	33.0156	33.2998	32.1085	34.0776	33.3375	33.6768
Cq2	27.8706	28.1716	28.3138	27.1722	27.4736	27.2194	27.4182	28.1366	27.8909	28.4654	27.2791	27.0636	27.5297	27.5952			Cq2	33.0285	32.0567	32.6483	33.1877	31.7722	34.0636	33.2646	33.5802
Figure S8A										Figure S8B
	TSG-6				HGF-1						TSG-6				HGF-1
	NEB	B47/MyTaq	B47/GoTaq	B47/ExTaq	NEB	B47/MyTaq	B47/GoTaq	B47/ExTaq			NEB	B47/MyTaq	B47/GoTaq	B47/ExTaq	NEB	B47/MyTaq	B47/GoTaq	B47/ExTaq
Cq1	24.7049	21.481	21.785	22.2915	20.3861	18.5973	19.1676	17.4522		Cq1	27.5529	27.1545	27.2255	26.3426	25.7355	26.4157	27.6108	25.0178
Cq2	24.3651	22.6958	21.8751	23.2725	20.2723	18.0742	19.1303	18.2448		Cq2	28.3697	26.3918	26.703	26.381	26.4692	25.6013	27.1442	25.0769
Cq3	26.1273	22.1262	21.672	23.7147	18.0285	18.9757	20.0448	18.188		Cq3	28.2639	26.6727	26.2517	26.3639	26.3848	25.8767	26.6528	25.0003
Cq4	24.1285	22.1795	21.9142	23.4035	21.5932	19.4885	19.0708	18.7121		Cq4	28.492	26.4332	26.7655	26.2446	26.5584	25.7081	27.0693	25.2211
Figure S9B								Figure S9D
CFX +5 min RT step	TSG-6			HGF-1				CFX no RT step	TSG-6			HGF-1
	Clara	NEB	ES/B47	Clara	NEB	Epi/B47			Clara	NEB	ES/B47	Clara	NEB	Epi/B47
Cq1	25.7209	23.9485	21.6253	22.24	21.42	21.46		Cq1	27.4065	26.4165	21.8763	25.5217	26.0025	23.1271
Cq2	25.8685	24.2109	21.5604	22.43	21.81	21.33		Cq2	27.3475	26.5882	21.8646	24.897	26.023	22.32
Cq3	25.3386	25.5283	21.6415	21.51	21.88	21.03		Cq3	26.9757	26.9641	22.0814	24.7564	26.0037	22.5169
Cq4	25.5086	25.8481	21.7374	21.43	22.36	21.24		Cq4	27.0917	27.1117	21.9069	24.9017	26.0348	22.3926
